# Supplementary material for: Polysaccharides from Callerya speciosa alleviate metabolic disorders and gut microbiota dysbiosis in diet-induced obese C57BL/6 mice
Source: Royal Society of Chemistry journal article supplement (doi:10.1039/d2fo00337f), 2022-01-01
Supplement: d2fo00337f1.pdf [file d2fo00337f1.pdf]

**Polysaccharides from *Callerya speciosa* alleviate metabolic disorders and gut  
microbiota dysbiosis in diet-induced obese C57BL/6 mice**

Dongli Li<sup>1,4</sup>, Zhaonan Xu<sup>2</sup>, Yuanyuan Li<sup>2</sup>, Lishe Gan<sup>1,4</sup>, Panpan Wu<sup>1,4</sup>, Rihui Wu<sup>1,4</sup>, Jingwei  
Jin<sup>1,4</sup>, Xi Zheng<sup>1,4</sup>, Kun Zhang<sup>1</sup>, Hang Ma<sup>1,3,\*</sup>, Liya Li<sup>2,\*</sup>

<sup>1</sup> School of Biotechnology and Health Sciences, Wuyi University, Jiangmen 529020, China

<sup>2</sup> Institute of Microbial Pharmaceuticals, College of Life and Health Sciences, Northeastern  
University, Shenyang 110819, China

<sup>3</sup> Bioactive Botanical Research Laboratory, Department of Biomedical and Pharmaceutical  
Sciences, College of Pharmacy, University of Rhode Island, Kingston, RI, 02881, United States

<sup>4</sup> International Healthcare Innovation Institute (Jiangmen), Jiangmen 529040, China

**Table S1. Primer sequences for real-time PCR**

| <b>Genes</b>  | <b>Forward</b>          | <b>Reverse</b>        |
|---------------|-------------------------|-----------------------|
| 18S           | AGTCCCTGCCCTTTGTACACA   | CGATCCGAGGGCCTCACTA   |
| Atgl          | GGATGGCGGCATTTTCAGACA   | CAAAGGGTTGGGTTGGTTCAG |
| Cebp $\alpha$ | CAAGAACAGCAACGAGTACCG   | GTCACTGGTCAACTCCAGCAC |
| Hsl           | GATGTCACAGTCAATGGAGACAC | GGTGAAACCCCTCAGGGAAAG |
| Mgl           | CAGAGAGGCCAACCTACTTTTC  | ATGCGCCCCAAGGTCATATTT |
| Srebplc       | GCAGCCACCATCTAGCCTG     | CAGCAGTGAGTCTGCCTTGAT |

**Table S2. Body weight, body weight gain, food and energy intake in three groups of mice (n = 9)**

| <b>Parameter</b>              | <b>SD</b>    | <b>HFD</b>                  | <b>HFD +NP</b>             |
|-------------------------------|--------------|-----------------------------|----------------------------|
| Body weight (g)               | 26.21 ± 0.36 | 32.34 ± 0.80 <sup>###</sup> | 27.13 ± 0.44 <sup>**</sup> |
| Body weight gain (g)          | 6.24 ± 0.30  | 12.85 ± 0.75 <sup>###</sup> | 8.00 ± 0.35 <sup>***</sup> |
| Food intake (g/day/mice)      | 3.34 ± 0.12  | 2.19±0.14 <sup>###</sup>    | 1.77 ± 0.06 <sup>***</sup> |
| Energy intake (kcal/day/mice) | 12.12 ± 0.42 | 11.73 ± 0.63                | 9.23 ± 0.31 <sup>**</sup>  |

<sup>###</sup>,  $p < 0.001$ , HFD vs. SD group; <sup>\*\*\*</sup>,  $p < 0.001$ , <sup>\*\*</sup>,  $p < 0.01$ , HFD+NP vs. HFD group.

**Table S3. Relative abundance of the top 30 genera in fecal samples collected from three groups of mice at week 10**

| <b>Bacterial name</b>                | <b>SD (%)</b>  | <b>HFD (%)</b>               | <b>HFD +NP (%)</b>          |
|--------------------------------------|----------------|------------------------------|-----------------------------|
| <i>Anaerotruncus</i>                 | 0.172 ± 0.011  | 0.567 ± 0.025 <sup>###</sup> | 0.605 ± 0.045               |
| <i>Lachnospiraceae_UCG-006</i>       | 0.215 ± 0.017  | 0.726 ± 0.033 <sup>###</sup> | 0.977 ± 0.052               |
| <i>Intestinimonas</i>                | 0.353 ± 0.023  | 2.718 ± 0.139 <sup>###</sup> | 2.332 ± 0.091               |
| <i>Romboutsia</i>                    | 0.023 ± 0.001  | 0.382 ± 0.034 <sup>#</sup>   | 0.755 ± 0.063 <sup>*</sup>  |
| <i>Odoribacter</i>                   | 1.380 ± 0.089  | 4.258 ± 0.247 <sup>###</sup> | 7.694 ± 0.586 <sup>*</sup>  |
| <i>Ruminiclostridium</i>             | 0.349 ± 0.033  | 2.184 ± 0.061 <sup>###</sup> | 2.590 ± 0.183               |
| <i>Tyzzerella</i>                    | 0.044 ± 0.002  | 0.627 ± 0.036 <sup>###</sup> | 0.523 ± 0.039               |
| <i>Ruminiclostridium_9</i>           | 0.479 ± 0.018  | 2.696 ± 0.050 <sup>###</sup> | 2.645 ± 0.100               |
| <i>Oscillibacter</i>                 | 0.099 ± 0.001  | 1.651 ± 0.002 <sup>###</sup> | 1.168 ± 0.003               |
| <i>Rikenellaceae_RC9_gut_group</i>   | 0.396 ± 0.064  | 1.471 ± 0.078 <sup>#</sup>   | 2.058 ± 0.143               |
| <i>Mucispirillum</i>                 | 0.719 ± 0.004  | 5.477 ± 0.010 <sup>###</sup> | 2.075 ± 0.007 <sup>**</sup> |
| <i>Acetatifactor</i>                 | 0.092 ± 0.018  | 0.574 ± 0.048 <sup>##</sup>  | 0.244 ± 0.034 <sup>*</sup>  |
| <i>Lachnoclostridium</i>             | 0.855 ± 0.038  | 1.484 ± 0.039 <sup>###</sup> | 1.284 ± 0.051               |
| <i>Faecalibaculum</i>                | 0.605 ± 0.105  | 2.692 ± 0.288 <sup>#</sup>   | 3.713 ± 0.534               |
| <i>Roseburia</i>                     | 1.013 ± 0.139  | 1.468 ± 0.093                | 1.109 ± 0.085               |
| <i>Akkermansia</i>                   | 0.194 ± 0.044  | 0.327 ± 0.113                | 0.006 ± 0.001               |
| <i>Erysipelatoclostridium</i>        | 0.017 ± 0.002  | 0.028 ± 0.003                | 0.196 ± 0.064               |
| <i>Bacteroides</i>                   | 1.543 ± 0.232  | 1.393 ± 0.106                | 2.105 ± 0.166               |
| <i>Ruminococcaceae_UCG-014</i>       | 0.323 ± 0.030  | 0.488 ± 0.088                | 0.290 ± 0.034               |
| <i>Alloprevotella</i>                | 1.328 ± 0.115  | 2.982 ± 0.726                | 7.333 ± 1.863               |
| <i>Helicobacter</i>                  | 7.531 ± 0.777  | 4.296 ± 0.255 <sup>#</sup>   | 2.745 ± 0.223               |
| <i>Lachnospiraceae_NK4A136_group</i> | 14.662 ± 0.633 | 10.800±0.615                 | 9.606±0.612                 |
| <i>Candidatus_Saccharimonas</i>      | 0.342 ± 0.037  | 0.273 ± 0.065                | 0.164 ± 0.014               |
| <i>Ruminiclostridium_6</i>           | 0.278 ± 0.043  | 0.016 ± 0.003 <sup>#</sup>   | 0.017 ± 0.002               |
| <i>Lactobacillus</i>                 | 1.914 ± 0.276  | 0.374 ± 0.062 <sup>#</sup>   | 1.994 ± 0.499               |
| <i>Alistipes</i>                     | 2.443 ± 0.153  | 1.104 ± 0.053 <sup>#</sup>   | 1.108 ± 0.061               |
| <i>Prevotellaceae_UCG-001</i>        | 0.678 ± 0.063  | 0.009 ± 0.001 <sup>#</sup>   | 0.018 ± 0.002               |

|                                        |               |                              |                            |
|----------------------------------------|---------------|------------------------------|----------------------------|
| <i>Dubosiella</i>                      | 1.209 ± 0.060 | 0.030 ± 0.002 <sup>#</sup>   | 0.222 ± 0.008 <sup>*</sup> |
| <i>Lachnospiraceae_UCG-001</i>         | 0.931 ± 0.075 | 0.011 ± 0.001 <sup>###</sup> | 0.011 ± 0.001              |
| <i>[Eubacterium]xylanophilum_group</i> | 0.673 ± 0.025 | 0.157 ± 0.016 <sup>###</sup> | 0.164 ± 0.018              |

n = 8 per group. <sup>#</sup>  $p < 0.05$ , <sup>##</sup>  $p < 0.01$ , <sup>###</sup>  $p < 0.001$ , HFD vs. SD group; <sup>\*</sup>  $p < 0.05$ , <sup>\*\*</sup>  $p < 0.01$ , HFD+NP vs. HFD group.
